# Supplementary material
Source: PubMed Central journal article supplement (PMC5896574)
Supplement: NIHMS955554-supplement-Supporting_Information.pdf [file NIHMS955554-supplement-Supporting_Information.pdf]

## Supporting Information

# Design, synthesis, biological evaluation, and X-ray studies of HIV-1 protease inhibitors with modified P2'-ligands of Darunavir

Arun K. Ghosh, W. Sean Fyvie, Margherita Brindisi, Melinda Steffey, Johnson Agniswamy, Yuan-Fang Wang, Manabu Aoki, Masayuki Amano, Irene T. Weber, and Hiroaki Mitsuya

### Contents

|                                                                                                 |        |
|-------------------------------------------------------------------------------------------------|--------|
| Copies of $^1\text{H}$ and $^{13}\text{C}$ NMR spectra of key intermediates and inhibitors..... | S2-S15 |
| Crystallographic data Table.....                                                                | S-16   |
| Virus and cell biology.....                                                                     | S-17   |

### Experimental Section

All moisture sensitive reactions were carried out in an oven dried flask under argon atmosphere. All chemicals and reagents were purchased from commercial suppliers and used without further purification. Anhydrous solvents were obtained as follows: anhydrous tetrahydrofuran, diethyl ether, and benzene were distilled from sodium metal under argon. Anhydrous dichloromethane, toluene, methanol, and acetonitrile were dried via distillation from  $\text{CaH}_2$  under argon. All other solvents were HPLC grade.  $^1\text{H}$  NMR and  $^{13}\text{C}$  NMR spectra were recorded on Varian INOVA300-1, Bruker Avance ARX-400 and Bruker DRX-500 spectrometers. NMR data are reported as:  $\delta$  value (chemical shift,  $J$ -value (Hz), integration, where s = singlet, d = doublet, t = triplet, q = quartet, br = broad). Low resolution mass analyses were performed on a Agilent 1290 Infinity II spectrometer. High Resolution mass analyses were performed at the Purdue University Campus-wide Mass Spectrometry Center. TLC analysis was carried out with SiliCycle 60A-F<sub>254</sub> plates. Flash chromatography was performed using SiliCycle 230-400 mesh, 60 Å pore diameter silica gel. HPLC analysis was performed on a Agilent 1260 Infinity instrument. All test inhibitors showed purity >95% by HPLC analysis.

Compound **3a**:  $^1\text{H-NMR}$  (500 MHz,  $\text{CD}_3\text{OD}$ )

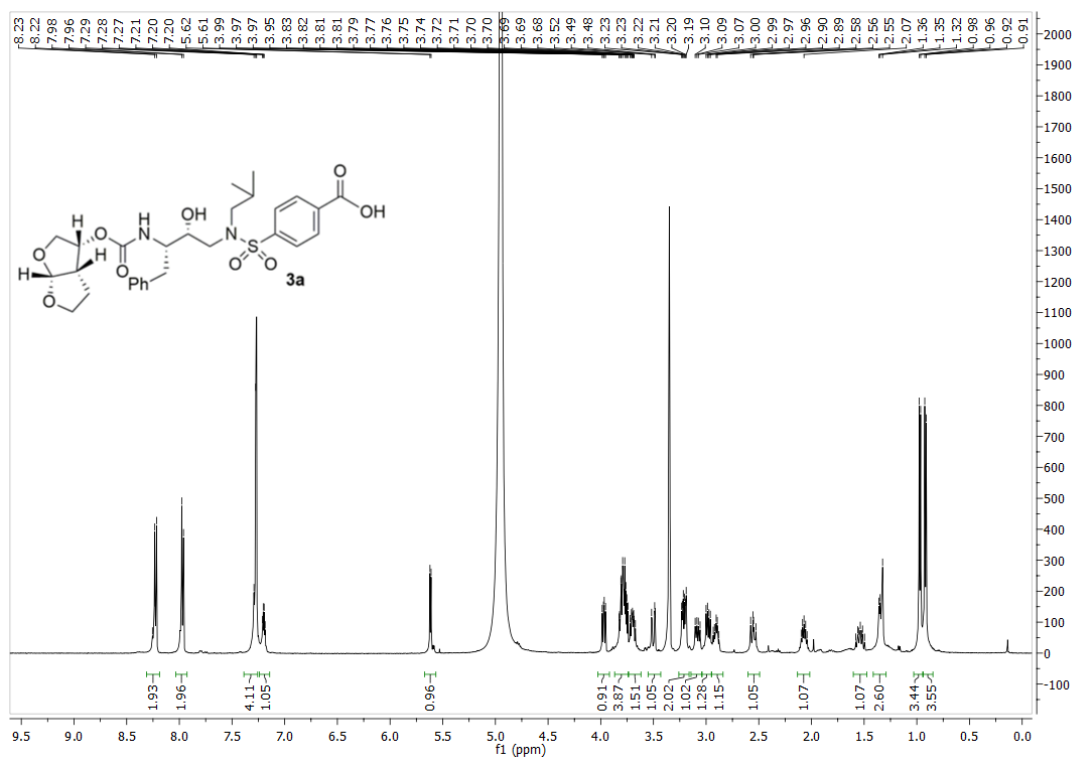

Compound **3a**:  $^{13}\text{C-NMR}$  (125 MHz,  $\text{CD}_3\text{OD}$ )

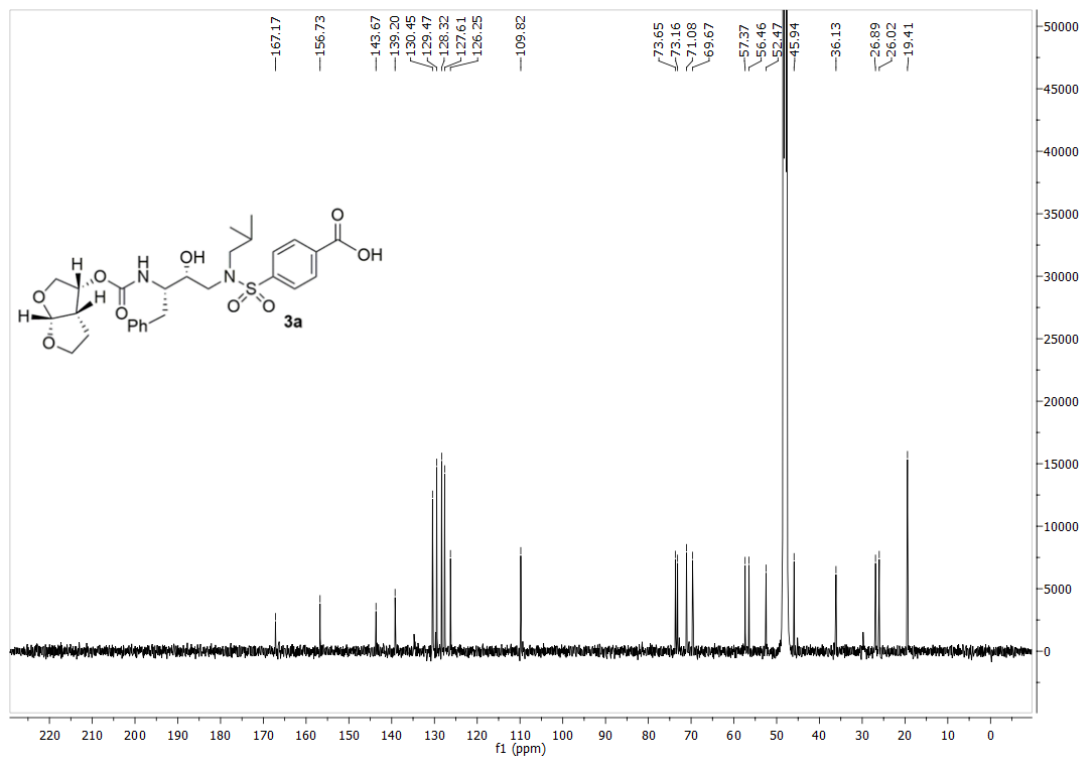

Compound **3b**:  $^1\text{H-NMR}$  (400 MHz,  $\text{CDCl}_3$ )

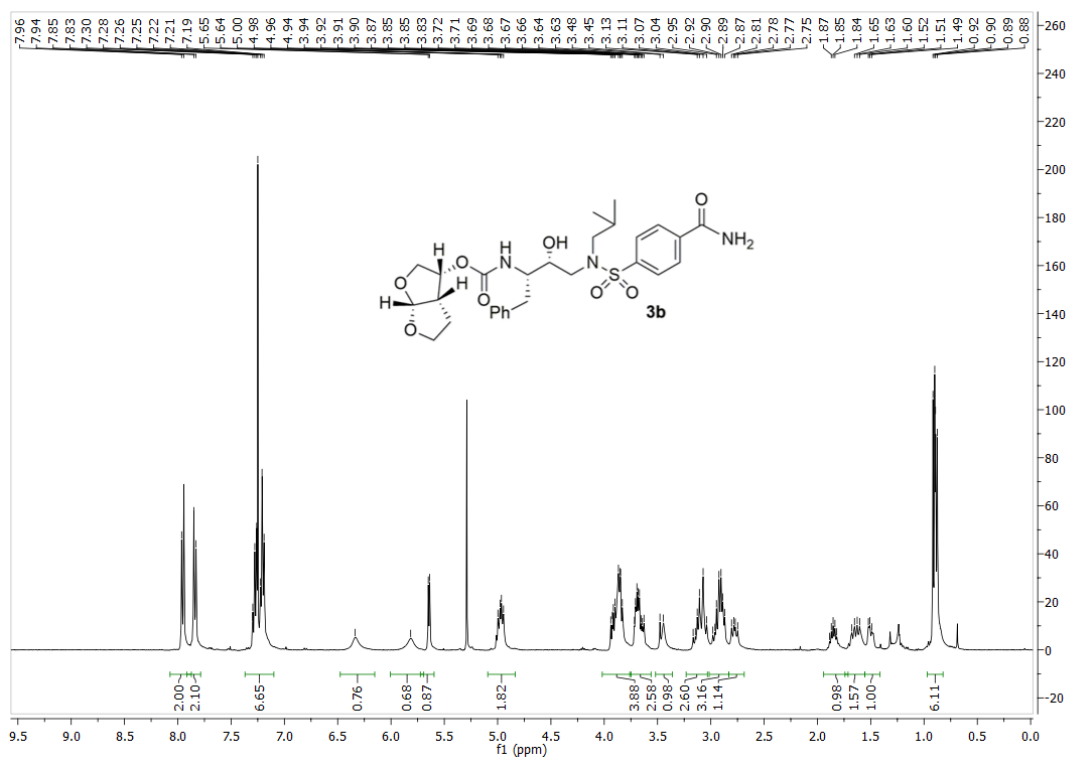

Compound **3c**:  $^1\text{H-NMR}$  (400 MHz,  $\text{CDCl}_3$ )

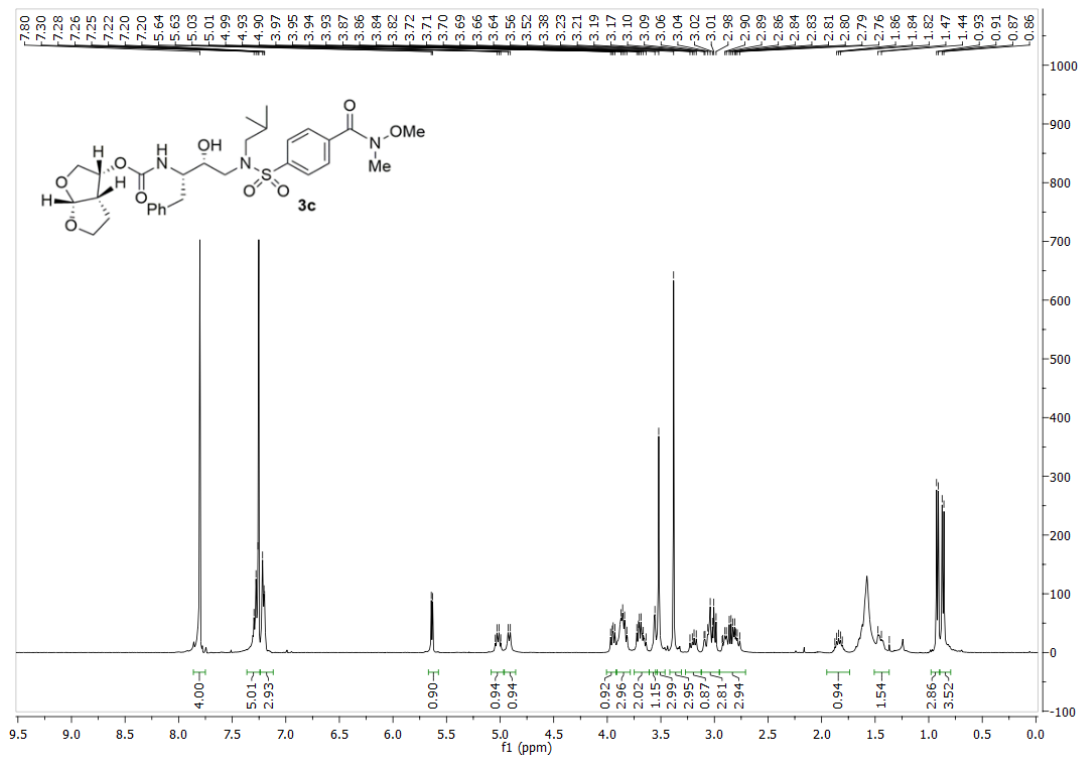

Compound **3d**:  $^1\text{H-NMR}$  (400 MHz,  $\text{CDCl}_3$ )

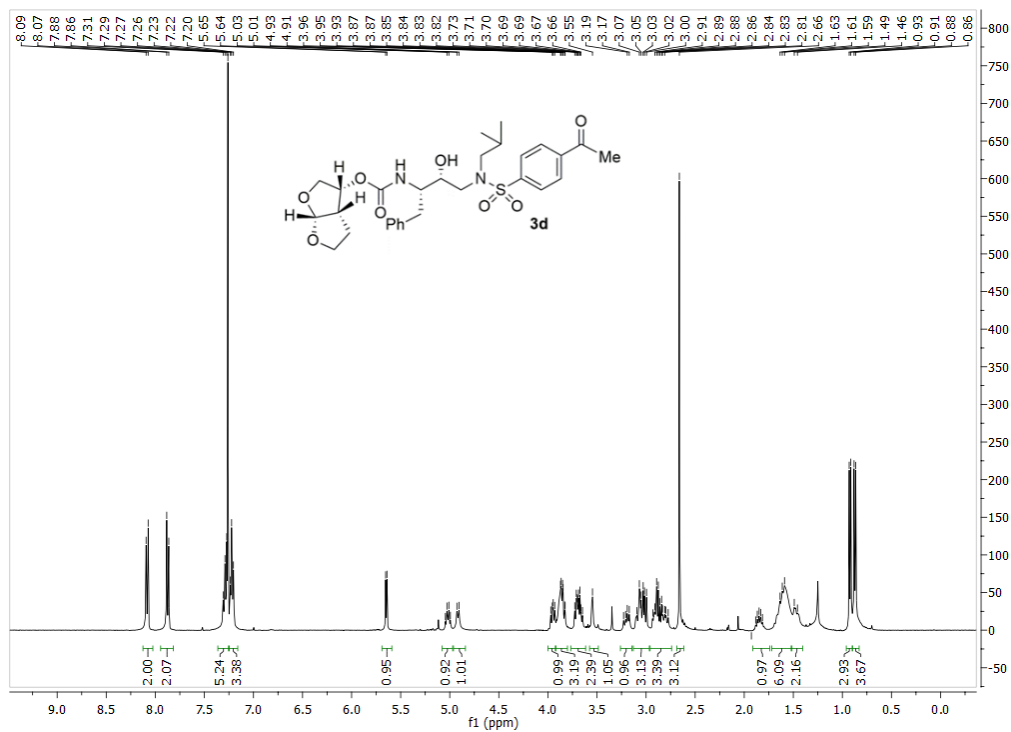

Compound **3e**:  $^1\text{H-NMR}$  (500 MHz,  $\text{CDCl}_3$ )

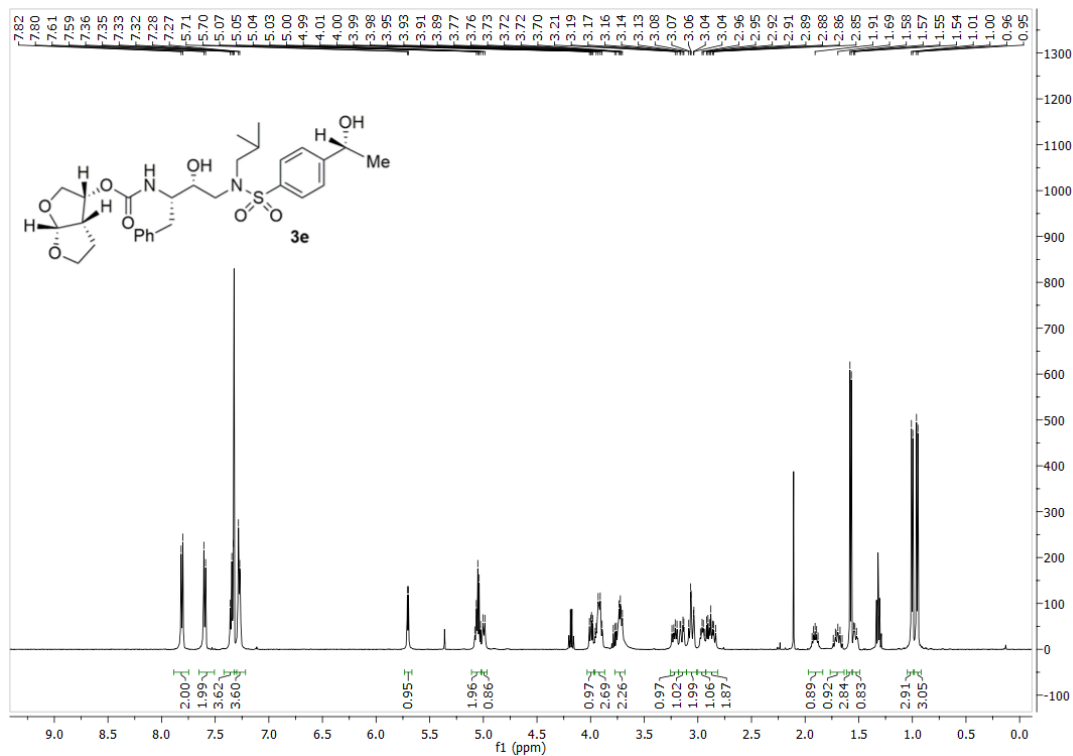

Compound **3e**:  $^{13}\text{C}$ -NMR (125 MHz,  $\text{CDCl}_3$ )

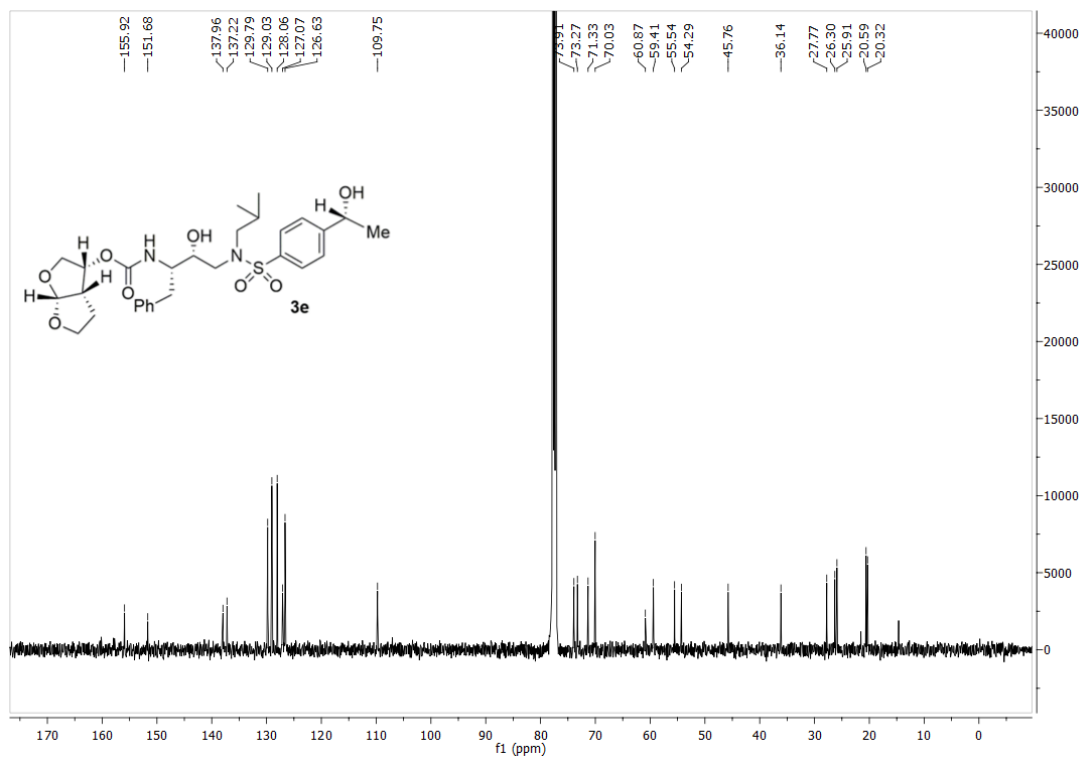

Compound **3f**:  $^1\text{H}$ -NMR (500 MHz,  $\text{CDCl}_3$ )

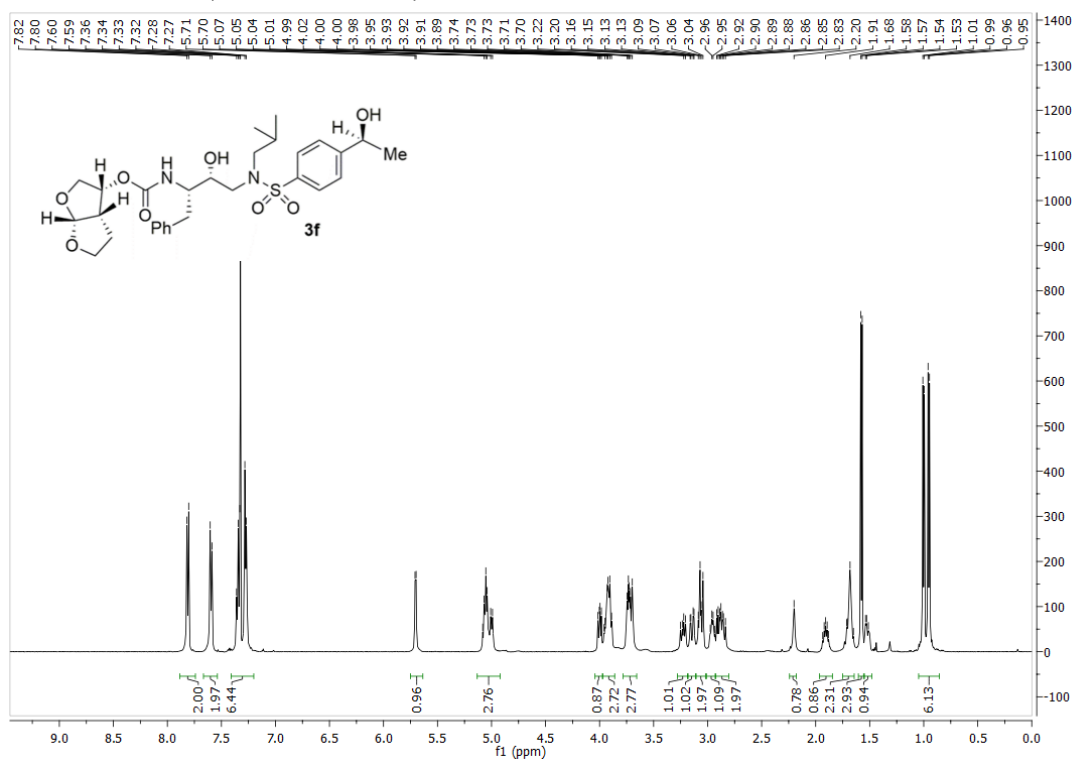



Compound **3g**:  $^{13}\text{C}$ -NMR (125 MHz,  $\text{CDCl}_3$ )

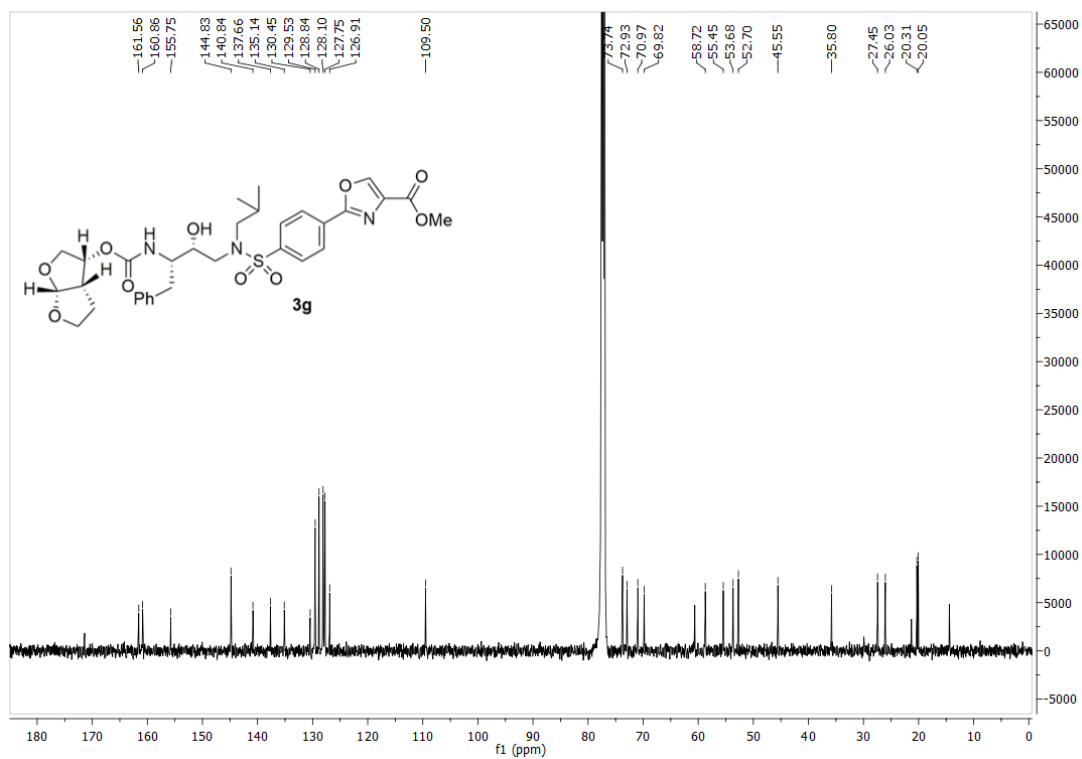

Compound **3h**:  $^1\text{H}$ -NMR (500 MHz,  $\text{CDCl}_3$ )

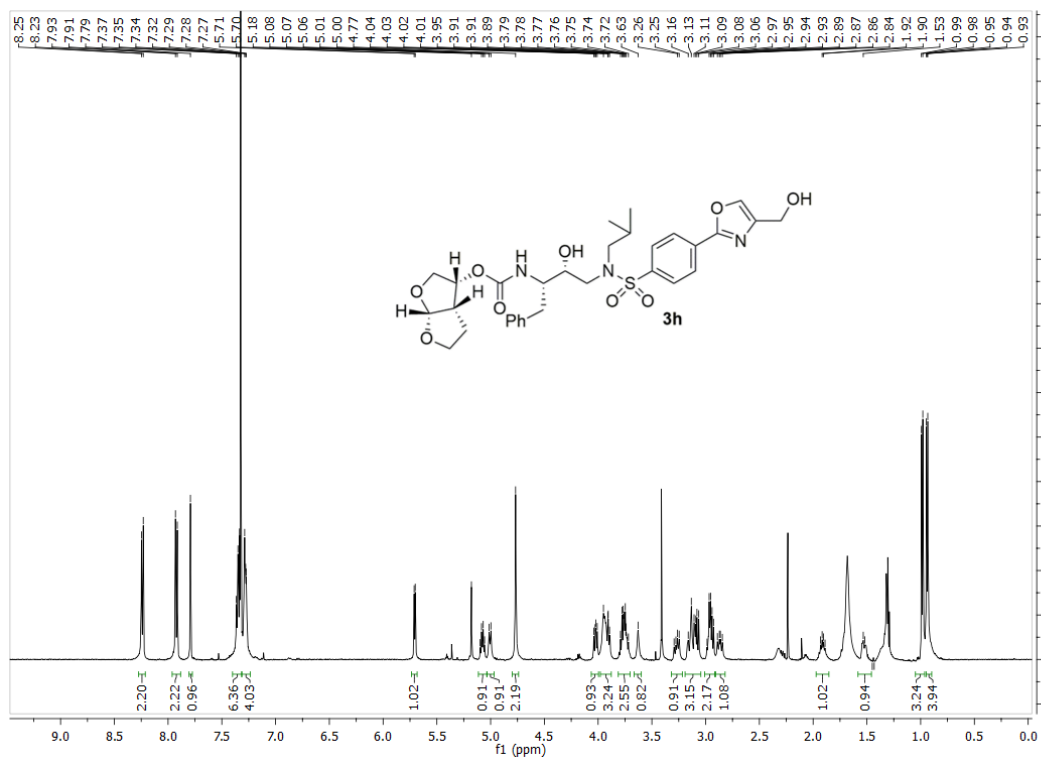





Compound **3i**:  $^{13}\text{C}$ -NMR (125 MHz,  $\text{CDCl}_3$ )

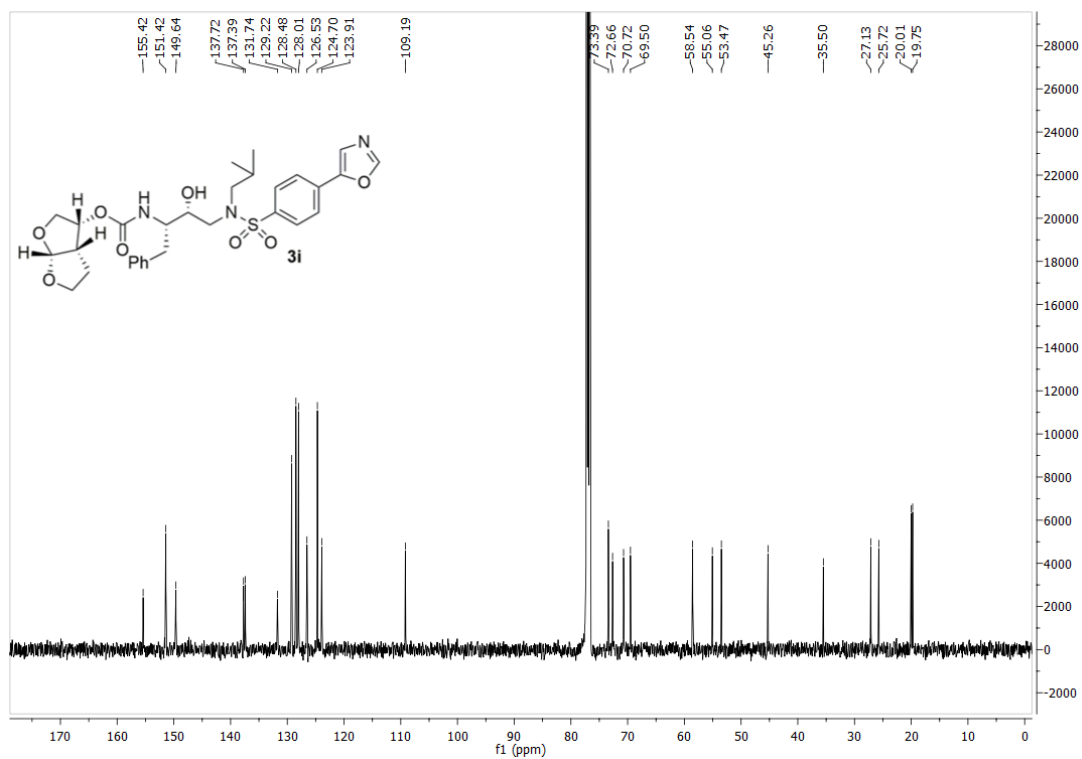

Compound **3j**:  $^1\text{H}$ -NMR (500 MHz,  $\text{CDCl}_3$ )

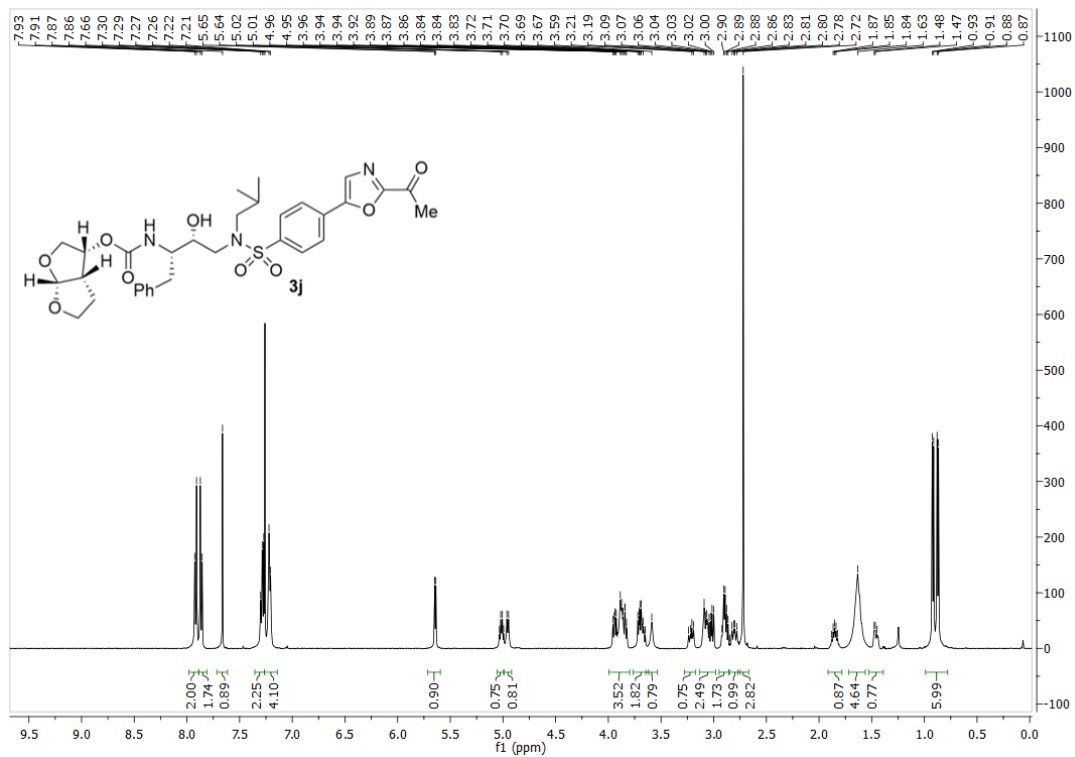

Compound **3j**:  $^{13}\text{C}$ -NMR (125 MHz,  $\text{CDCl}_3$ )

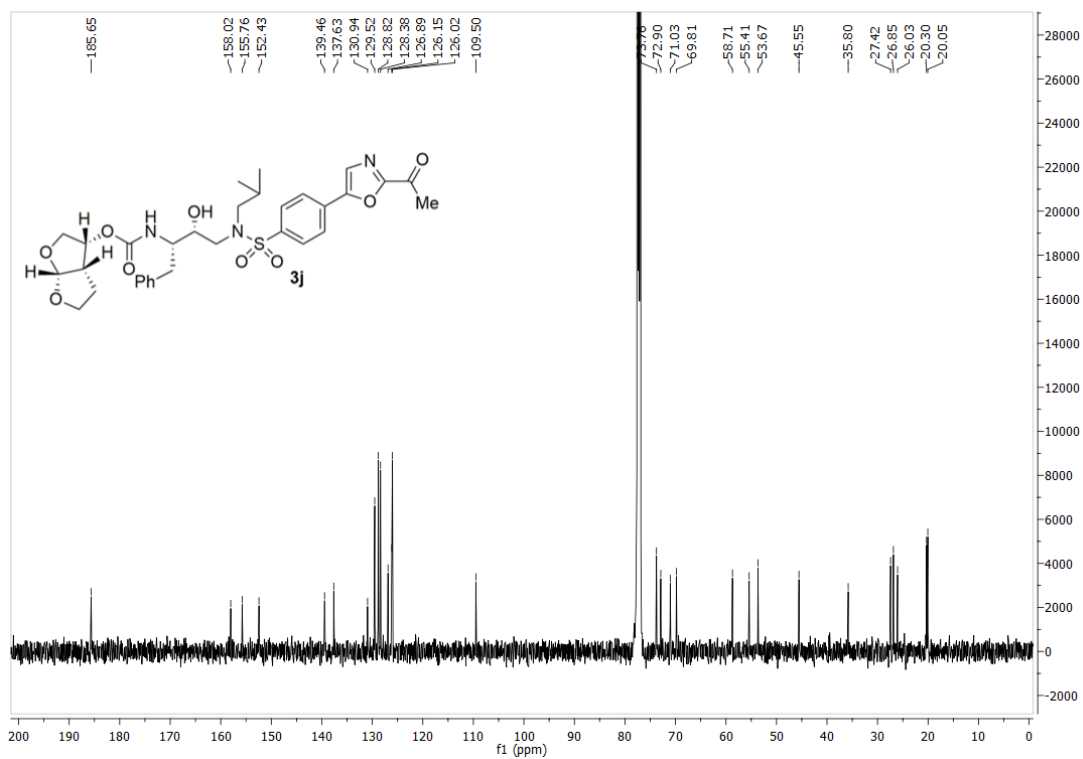

Compound **3k**:  $^1\text{H}$ -NMR (500 MHz,  $\text{CDCl}_3$ )

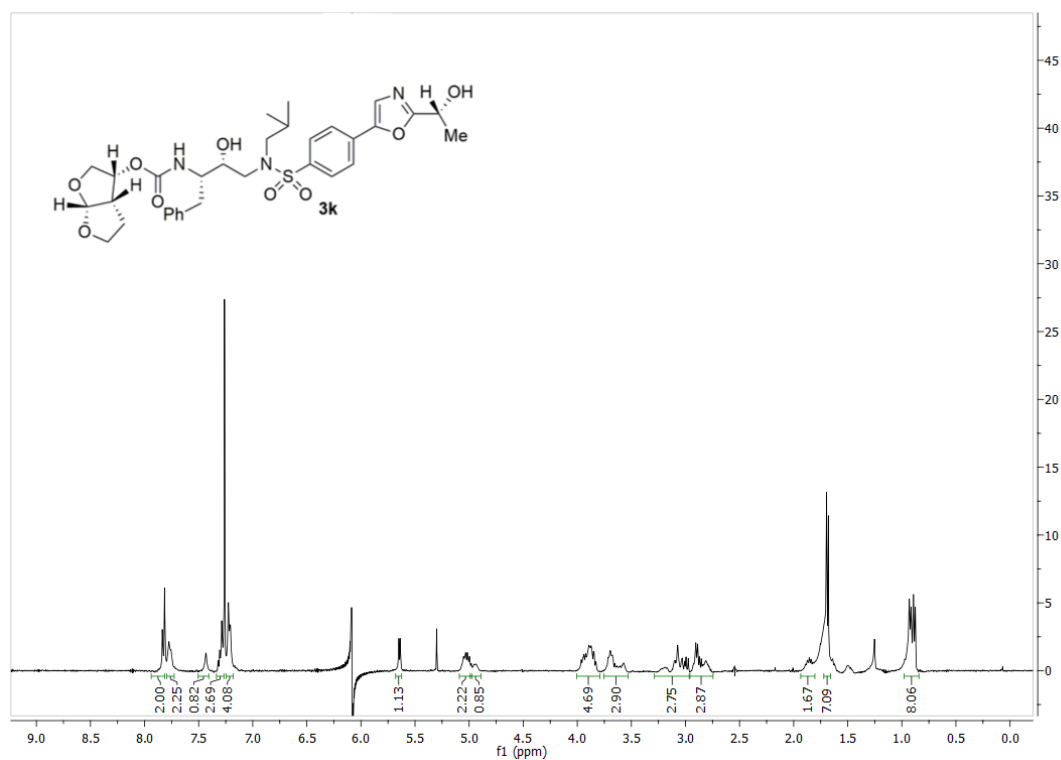



Compound **7**:  $^{13}\text{C}$ -NMR (100 MHz,  $\text{DMSO}-d_6$ )

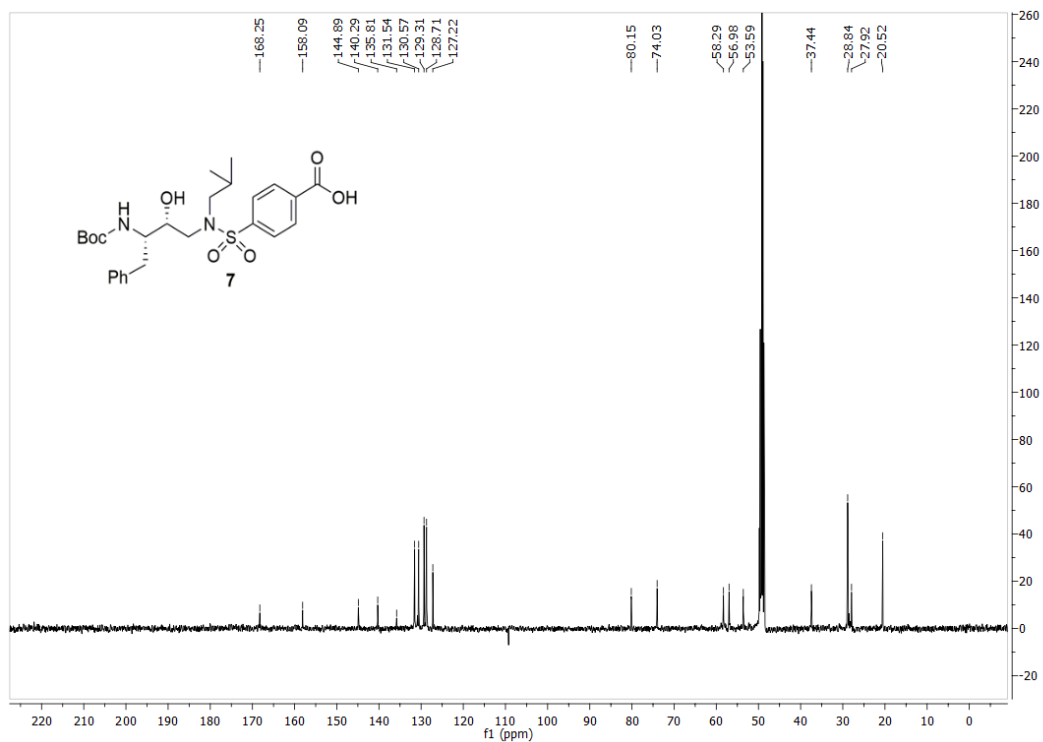

Compound **8**:  $^1\text{H}$ -NMR (400 MHz,  $\text{CDCl}_3$ )

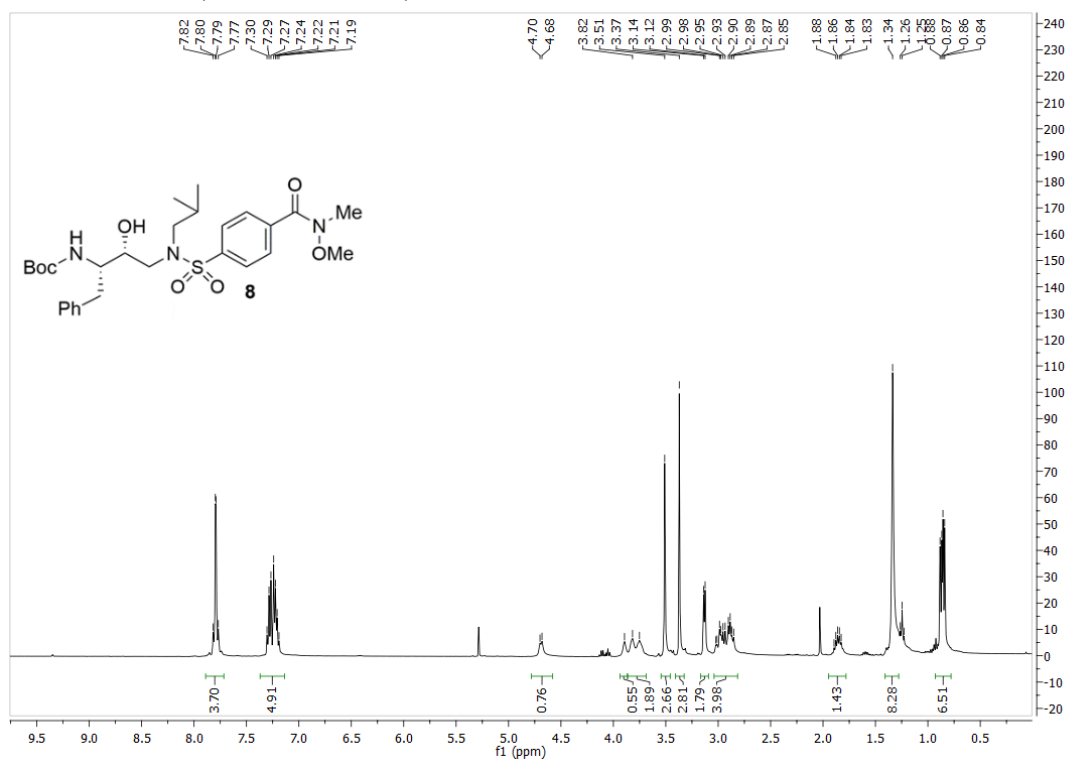

Compound **8**:  $^{13}\text{C-NMR}$  (100 MHz,  $\text{CDCl}_3$ )

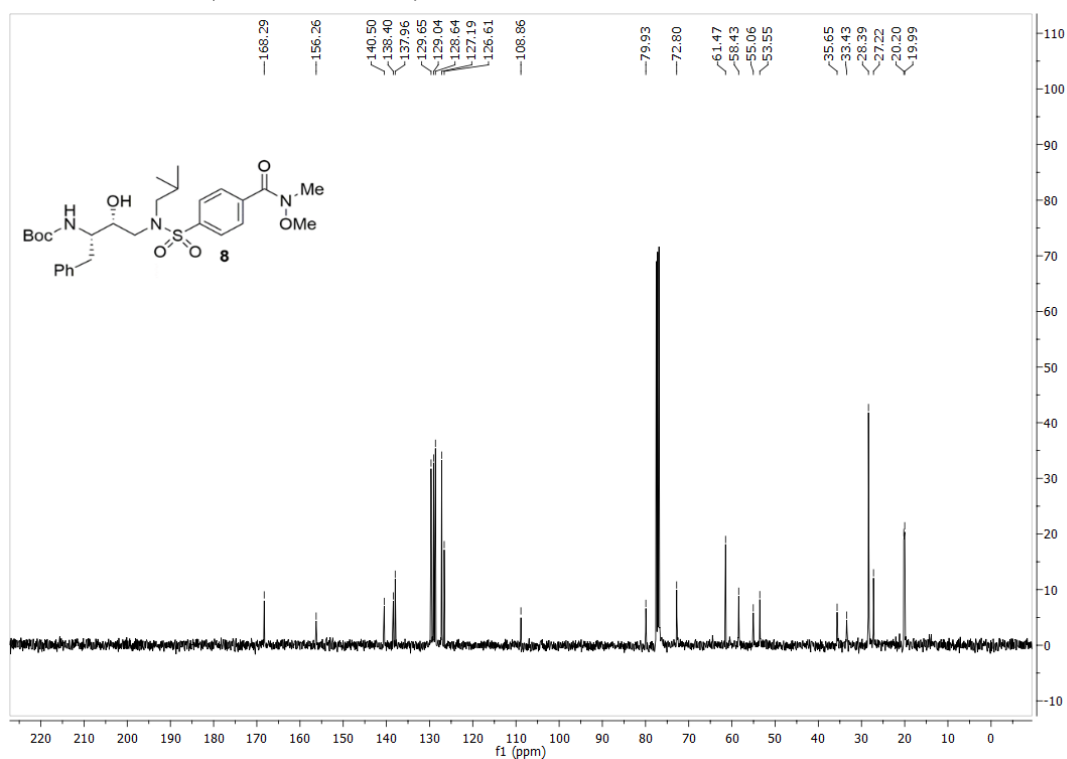

Compound **9**:  $^1\text{H-NMR}$  (400 MHz,  $\text{CDCl}_3$ )

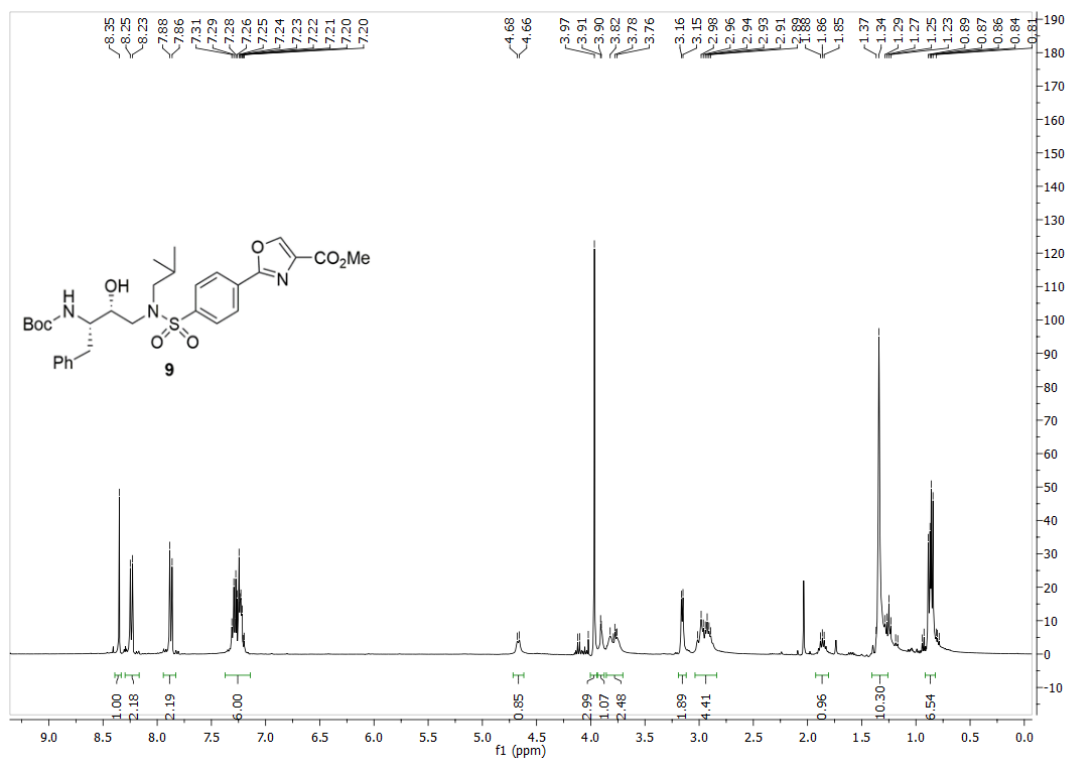

Compound **9**:  $^{13}\text{C-NMR}$  (100 MHz,  $\text{CDCl}_3$ )

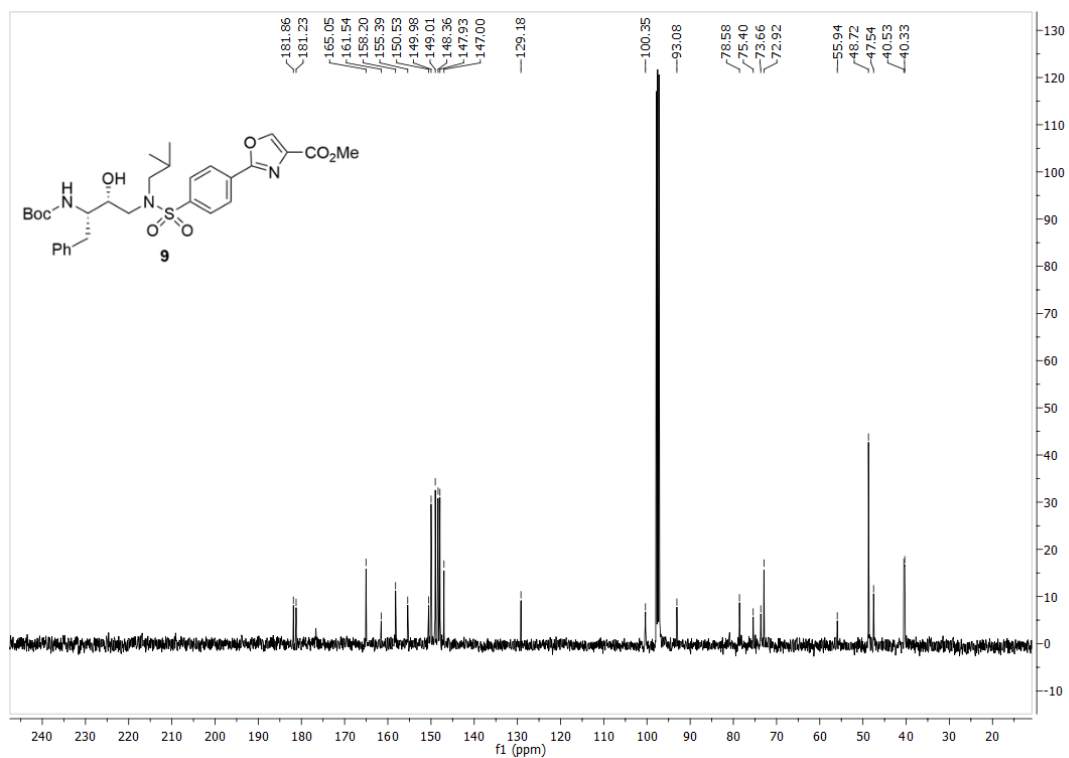

Compound **10**: <sup>1</sup>H-NMR (500 MHz, CDCl<sub>3</sub>)

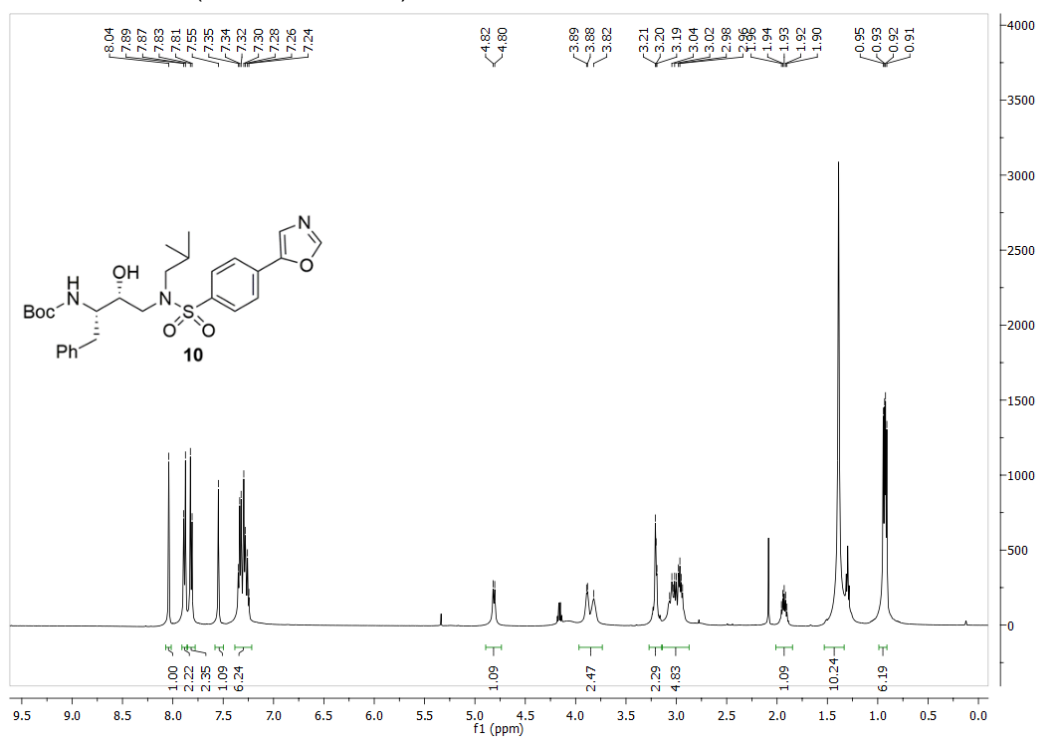

Compound **10**: <sup>13</sup>C-NMR (125 MHz, CDCl<sub>3</sub>)

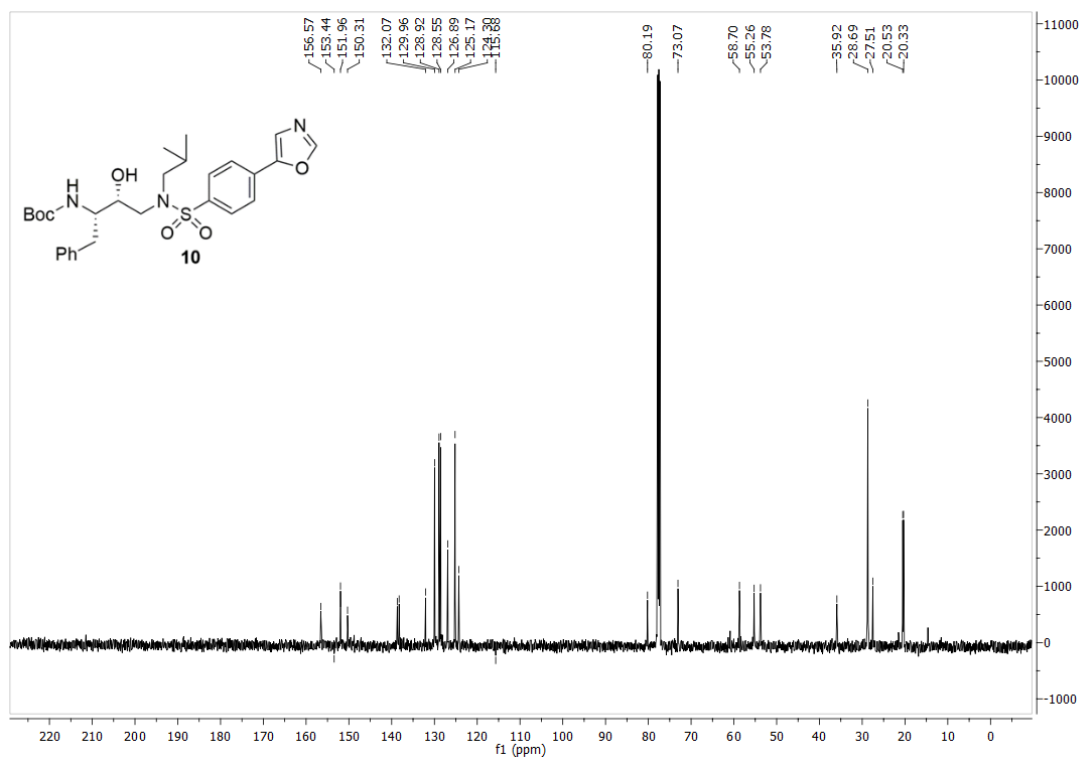

Compound 11: <sup>1</sup>H-NMR (500 MHz, CDCl<sub>3</sub>)

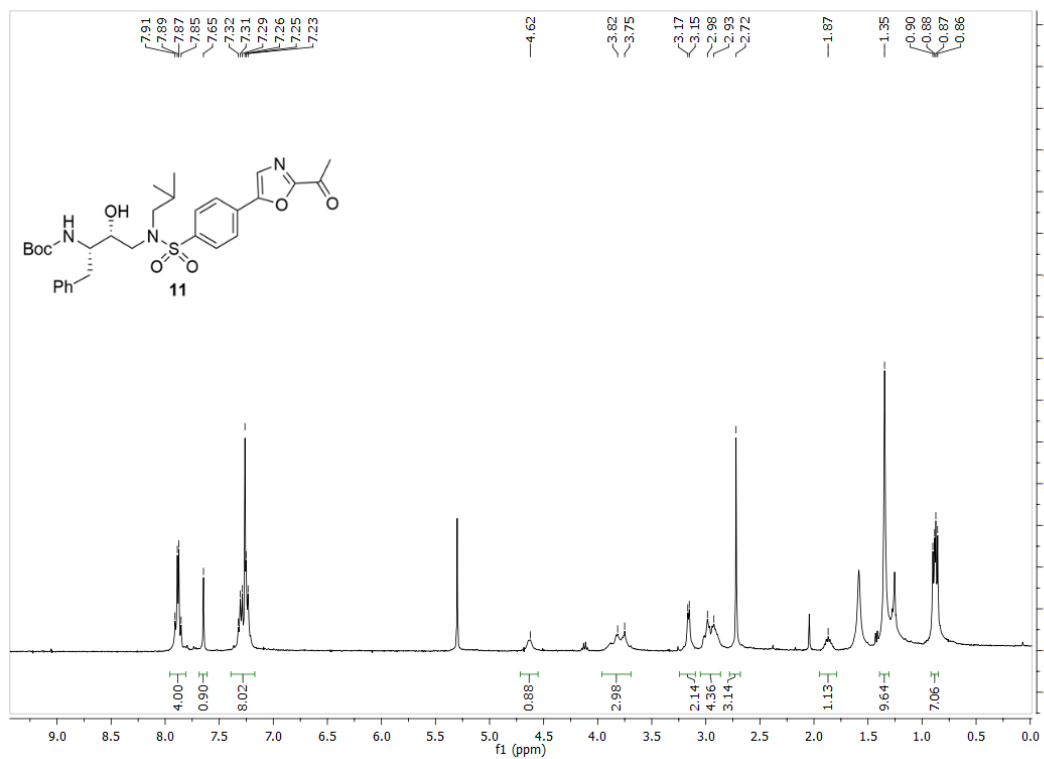

Table 1: Crystallographic Data Collection and Refinement Statistics

|                                              |                                  |
|----------------------------------------------|----------------------------------|
|                                              | WT-053-11A                       |
| Space group                                  | P2 <sub>1</sub> 2 <sub>1</sub> 2 |
| Unit cell dimensions: (Å)                    |                                  |
| A                                            | 57.99                            |
| B                                            | 86.40                            |
| C                                            | 45.76                            |
| Resolution range (Å)                         | 50-1.30                          |
| Unique reflections                           | 53863                            |
| R <sub>merge</sub> (%) overall (final shell) | 7.8 (39.3)                       |
| I/σ(I) overall (final shell)                 | 19.7 (2.1)                       |
| Completeness (%) overall (final shell)       | 94.2 (63.0)                      |
| Redundancy overall (final shell)             | 5.6 (2.1)                        |
| Refinement                                   |                                  |
| R (%)                                        | 15.4                             |
| R <sub>free</sub> (%)                        | 19.6                             |
| No. of solvent atoms (total occupancies)     | 234 (179.95)                     |
| RMS deviation from ideality                  |                                  |
| Bonds (Å)                                    | 0.012                            |
| Angle distance (Å)                           | 0.031                            |
| Wilson Plot B factor                         | 11.3                             |
| Average B-factors (Å <sup>2</sup> )          |                                  |
| Main-chain atoms                             | 12.6                             |
| Side-chain atoms                             | 18.5                             |
| Whole chain atoms                            | 15.5                             |
| Inhibitor                                    | 15.5                             |
| Solvent                                      | 26.5                             |



**Cells, viruses, and antiviral agents.** Human CD4<sup>+</sup> MT-2 cells were grown in RPMI-1640-based culture medium supplemented with 10% fetal calf serum (FCS: JRH Biosciences, Lenexa, MD), 50 unit/mL penicillin, and 100 µg/mL of kanamycin. The following HIV-1 viruses were employed for the drug susceptibility assay (see below): a laboratory HIV-1 strain (HIV-1<sub>LAI</sub>), a clinical HIV-1 strain isolated from drug-naive patients with AIDS (HIV-1<sub>ERS104pre</sub>) (1), and six HIV-1 clinical isolates which were originally isolated from patients with AIDS, who had received 9 to 11 anti-HIV-1 drugs over the past 32 to 83 months, and were genotypically and phenotypically characterized as multi-PI-resistant HIV-1 variants (1, 2). All such primary HIV-1 strains were passaged once or twice in 3-day old phytohemagglutinin-activated peripheral blood mononuclear cells (PHA-PBM), and the culture supernatants were stored at -80 °C until use. Amprenavir (APV) was received as a gift from Glaxo-Wellcome, Research Triangle Park, NC. Darunavir (DRV) was synthesized as previously described (3).

1. Yoshimura, K., et al. *Proc. Natl. Acad. Sci. USA* **96**, 8675-8680 (1999).
2. Koh, Y., et al. *Antimicrob. Agents Chemother.* **53**, 987-996 (2009).
3. Koh Y, et al *J Mol Biol* **282**, 28709-28720 (2007)
